# Supplementary material for: Improving Outcomes and Costs With System-Level, Physician-Led Interdisciplinary Case Review
Source: Atypon-hosted journal article supplement (doi:10.1176/appi.ps.201800176), 2019-02-13
Supplement: appi.ps.201800176.ds001.pdf [file appi.ps.201800176.ds001.pdf]

Following are some suggested reading materials related to this topic:

Frankel, Steven A. et al. *The Medical-Psychiatric Coordinating Physician–Led Model: Team-Based Treatment for Complex Patients*. *Psychosomatics*, Volume 55, Issue 4, 333 – 342

Kathol, Roger G. et al. *Psychiatrists for Medically Complex Patients: Bringing Value at the Physical Health and Mental Health/Substance-Use Disorder Interface*. *Psychosomatics*, Volume 50, Issue 2, 93 - 107

Kutash K, Acri M, Pollock M, Armusewicz K, Olin SS, Hoagwood KE. *Quality Indicators for Multidisciplinary Team Functioning in Community-Based Children’s Mental Health Services*. *Administration and policy in mental health*. 2014;41(1):55-68.  
doi:10.1007/s10488-013-0508-2.

Williams, B. C., Paik, J. L., Haley, L. L., & Grammatico, G. M. (2014). *Centralized Care Management Support for "High Utilizers" in Primary Care Practices at an Academic Medical Center*. *Care Management Journals*,15(1), 26-33. doi:10.1891/1521-0987.15.1.26
